# Supplementary material for: “Taller and Shorter”: Human 3-D Spatial Memory Distorts Familiar Multilevel Buildings
Source: PLoS One. 2015 Oct 28;10(10):e0141257. doi: 10.1371/journal.pone.0141257 (PMC4624999; doi:10.1371/journal.pone.0141257)
Supplement: S1 File — Supplementary information contains a semicolon-delimited CSV data file with pointing data (in deg) generated by Matlab. Each row contains data of one participant (15 columns horizontal angles and 15 columns vertical angles, one column for each target, same order as in Table 1). Missing values are denoted by the string 'NaN'. (XLS) [file pone.0141257.s001.xls]

## Sheet: Blatt2
horizontal_ 1	horizontal_ 2	horizontal_ 3	horizontal_ 4	horizontal_ 5	horizontal_ 6	horizontal_ 7	horizontal_ 8	horizontal_ 9	horizontal_10	horizontal_11	horizontal_12	horizontal_13	horizontal_14	horizontal_15	vertical_ 1	vertical_ 2	vertical_ 3	vertical_ 4	vertical_ 5	vertical_ 6	vertical_ 7	vertical_ 8	vertical_ 9	vertical_10	vertical_11	vertical_12	vertical_13	vertical_14	vertical_15
48.951	42.1481	45.6818	37.7524	-6.82354	44.3465	48.816	40.5617	-46.3142	NaN	-23.0033	-24.809	-53.4778	64.9401	39.7375	15.9643	38.0648	35.6639	49.4871	0.510208	7.2974	11.9733	11.1444	-14.5402	NaN	0.229495	0.657245	-0.384036	-6.71868	-1.84612
56.376	41.1181	55.8947	37.5768	-28.3521	41.0157	39.2034	44.5537	-55.5577	62.9013	-45.4148	-39.3518	-40.7592	53.383	18.5783	3.83479	33.5006	23.77	48.2558	-10.4493	-2.19238	-0.16547	-2.71738	-12.7735	-3.06086	-5.98557	-2.27141	-10.0835	-24.925	-6.23447
51.045	37.1563	43.3895	65.8013	-22.0212	29.4041	34.5947	46.7429	-65.2431	69.7141	-53.8803	-22.4913	-32.9613	67.4128	-13.4274	6.17287	39.8435	31.0377	56.3893	5.59743	5.13474	10.9238	9.43031	1.36448	2.52025	2.10267	5.18883	3.7271	-3.3453	3.30349
44.7934	6.0386	30.1562	80.4759	-16.4014	36.0726	48.8914	38.295	-61.7962	76.9454	-20.2557	-35.4394	-50.2521	60.3213	1.98208	12.7699	52.2353	55.9493	64.0542	-3.04795	-3.16825	3.00417	-2.36378	-2.15965	-1.5015	-3.97013	-1.59794	-6.57021	-14.9126	-12.6179
48.1017	16.9165	31.3733	25.8391	-21.7913	41.8055	42.3506	52.9784	-68.9327	68.565	-35.4499	-30.7048	-44.3401	61.7639	12.3182	5.93788	18.5487	29.1041	32.0396	-9.37782	2.08866	-1.42955	1.20682	2.90309	0.502153	2.58639	11.5636	-1.87492	-21.6384	-4.33054
73.8132	41.0361	67.0412	59.9238	62.646	56.9894	34.2661	-73.7351	86.7133	3.25888	-31.4996	-57.8647	84.853	43.8376	NaN	8.94311	39.925	35.2304	47.7349	-8.57916	11.1343	5.87473	0.605963	-1.17329	-1.60573	4.7784	-0.266994	-29.1902	-21.7394	NaN
52.8644	47.2137	46.8546	67.5797	-33.3022	36.4345	39.5201	35.5567	-68.1896	59.7851	-68.782	-14.2578	-38.6472	53.0371	3.91487	23.9068	30.5254	27.8798	3.70167	2.89532	12.8898	4.05024	7.47967	7.13439	-0.213126	4.97963	0.110654	5.73918	-41.7673	1.02188
45.674	40.1822	41.5611	34.6511	-29.4343	35.913	28.4959	37.4439	-74.6866	72.5694	-41.7816	-37.7853	-44.0195	81.6803	-12.7938	12.3373	24.2831	21.6326	33.3148	-15.3092	-2.98744	0.0631281	-0.116048	-12.8839	-0.173082	-7.80832	-0.632405	-2.35097	-18.9101	-17.3551
51.1502	32.8303	45.2324	62.6539	-7.67003	38.6365	39.9221	50.8557	-74.2894	53.687	-88.0241	-29.7765	-41.0807	57.8377	-2.08255	-0.602432	38.5064	31.285	43.824	-6.88561	3.54968	3.47995	0.921169	-9.55083	-1.05219	-15.1063	1.8952	-3.15148	-10.3993	-5.12459
47.329	13.9425	28.9968	-27.7429	35.6729	49.2591	54.0348	-73.8809	82.2103	-41.2761	-41.2546	-55.6716	48.7154	3.51614	NaN	6.10013	36.6371	24.4681	-12.4982	-4.63385	-8.35778	-5.46763	-10.9987	-2.19027	6.78494	-2.22045	-3.66456	-17.7957	-9.59609	NaN
56.2789	42.1658	49.8114	68.4542	24.6077	47.1139	45.4265	50.0303	-88.1795	66.7657	-34.5711	-13.7578	-53.7102	65.4799	-3.0778	3.53387	25.8672	20.6213	30.8479	-16.3447	-3.17817	-3.5485	0.536793	-8.58281	-5.77658	-9.40428	-6.70087	-4.92441	-20.8669	-15.7409
59.6718	35.2833	56.2675	54.8892	30.8926	54.6914	54.8293	47.4854	-53.94	64.3236	-52.6555	4.95459	-40.3118	60.1995	18.8445	7.01585	28.7815	30.2381	44.0391	-22.6742	-5.99009	-4.47536	-1.45276	-13.8389	-5.03686	-2.94361	-6.73971	-7.36743	-29.7928	-11.9278
32.6211	20.0091	39.5252	39.6321	25.6232	38.7472	50.4182	40.358	-43.2528	69.9178	-57.9611	-13.5656	-25.8874	54.7527	-21.3607	7.44014	20.8193	15.0157	27.5883	-24.8391	-6.8919	-6.61351	-6.17343	-14.3592	-7.80163	-12.9222	-6.01613	-9.1312	-15.1214	-16.311
59.0109	57.9702	65.1601	73.7887	-26.5674	48.2299	53.0387	64.4704	-102.449	74.2515	-46.5984	-32.5177	-57.4639	72.7543	9.08146	11.2997	44.3584	30.6615	46.7956	-9.5009	4.08343	-3.41671	-1.17949	-6.01915	-0.331279	1.00769	6.09843	2.3769	-13.5092	-16.5639
62.6133	43.6597	62.337	56.3116	-45.9083	45.077	NaN	49.0429	NaN	54.9681	-97.238	NaN	NaN	84.2771	-6.71081	8.07171	36.4823	29.7337	43.6773	-19.5596	1.09428	NaN	-5.67795	NaN	-0.318895	2.70516	NaN	NaN	-24.9399	-15.289
50.6331	29.4238	39.8442	35.9039	-11.7353	41.7643	39.1326	50.2444	-53.4271	56.7081	-39.3166	-5.00812	-40.9621	57.4786	23.4678	0.218987	16.3254	8.61701	18.7109	-33.3944	-5.25826	-5.12032	-9.37492	-8.44629	-10.7024	-7.69233	-12.3851	-11.2817	-14.7608	-15.9594
44.5374	47.5258	NaN	56.62	-1.62488	38.5944	44.2517	62.0655	-68.4744	45.0212	-51.3525	17.7919	-28.374	58.4122	3.23686	19.7385	32.1637	NaN	44.2178	-11.1593	-4.93921	-0.612122	-1.05086	-6.04199	-4.05408	-5.55728	0.730635	-12.4261	-16.7481	-2.65069
52.3922	38.7882	43.6526	9.47207	-9.31256	43.3546	60.894	58.2871	-38.8003	43.7443	-5.36208	6.58573	-13.0421	46.5584	1.30516	20.1602	40.9136	32.2439	40.5794	-22.1653	4.93009	6.19926	12.8359	8.69572	6.02541	8.07823	5.44218	-3.06034	-26.6953	-5.75085
44.8268	28.3621	46.1102	32.7967	-33.2812	46.7635	54.7105	58.3869	-82.8926	75.0115	-37.2364	-33.9568	-50.571	79.5078	-23.8383	16.6266	33.3805	30.4118	39.7256	-5.50155	10.0588	4.79737	10.3005	-8.93582	6.77589	2.35591	2.56765	-2.45018	-12.7865	-5.88755
27.2111	20.8187	30.83	0.814805	17.7361	53.9318	49.2911	52.976	-63.2607	65.4004	-41.4927	-31.9962	-30.3218	60.6466	-12.4825	23.2796	29.5901	19.939	45.7391	-7.814	9.63899	20.8822	6.59739	-7.65341	6.89301	-4.89987	1.66396	0.348422	-27.2479	-12.6921
58.9369	44.7506	61.1764	25.6016	4.9263	57.6919	62.4999	59.7356	-22.8722	68.9365	-39.9166	-29.9248	-35.9332	63.2176	34.7753	8.97904	17.1853	19.3602	33.5609	-12.9759	-2.24489	-2.79443	1.45182	-5.9124	0.0394766	-12.5352	-4.14217	-13.5025	-23.1894	-14.5475
